# Supplementary material for: The relationship between members of the canonical NF-κB pathway, components of tumour microenvironment and survival in patients with invasive ductal breast cancer
Source: PubMed Central journal article supplement (PMC5464845; doi:10.18632/oncotarget.16031), 2017-03-09
Supplement: oncotarget-08-33002-s001.pdf [file oncotarget-08-33002-s001.pdf]

# The relationship between members of the canonical NF- $\kappa$ B pathway, components of tumour microenvironment and survival in patients with invasive ductal breast cancer

## SUPPLEMENTARY FIGURES

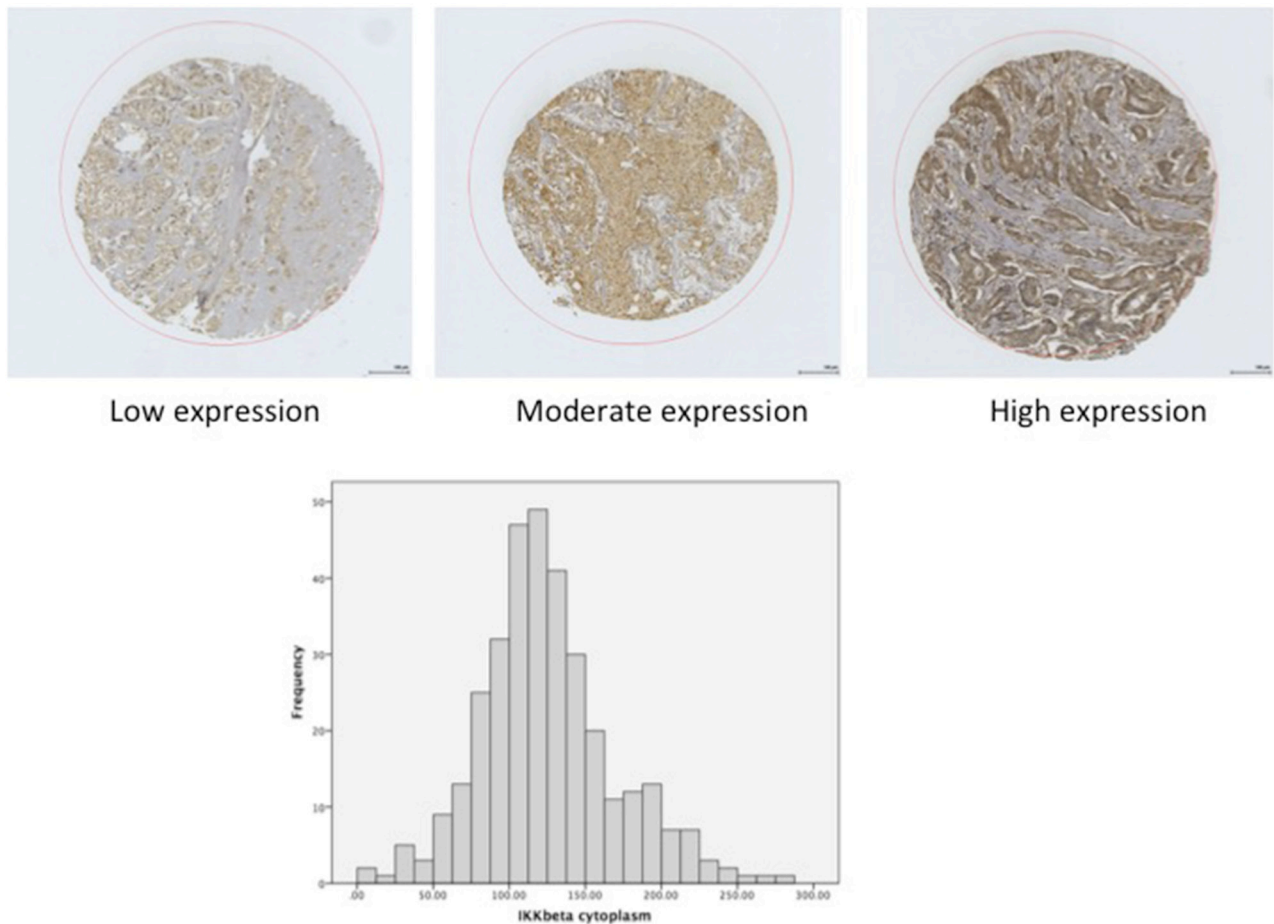

Supplementary Figure 1: Displays microphotographs illustrating low, moderate and high staining for IKK $\beta$ , with a histogram of the distribution of cytoplasmic IKK $\beta$  protein expression. Magnification x400.

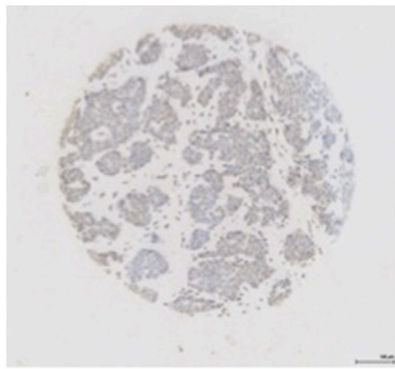

Low expression

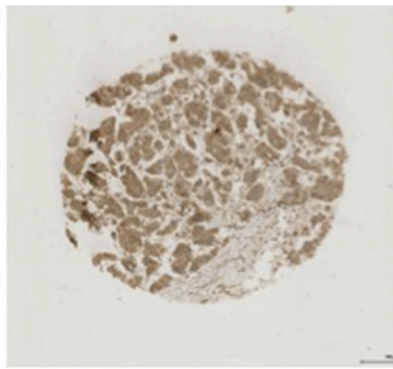

Moderate expression

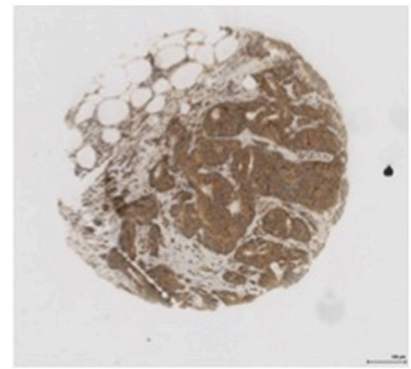

High expression

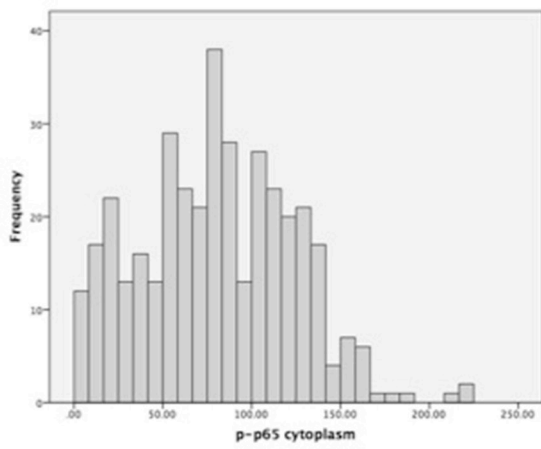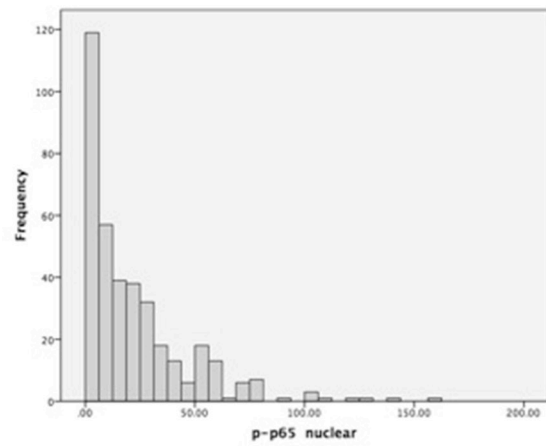

Supplementary Figure 2: Displays microphotographs illustrating low, moderate and high staining for p-p65, with histograms of the distribution of both cytoplasmic and nuclear p-p65 protein expression. Magnification x400.
